# Supplementary material
Source: PubMed Central journal article supplement (PMC5819345)
Supplement: NIHMS940934-supplement-Supplemental_files.pdf [file NIHMS940934-supplement-Supplemental_files.pdf]

Supplementary Materials for  
**Functional neuroimaging of high-risk 6-month-old infants predicts a  
diagnosis of autism at 24 months of age**

Robert W. Emerson,\* Chloe Adams, Tomoyuki Nishino, Heather Cody Hazlett,  
Jason J. Wolff, Lonnie Zwaigenbaum, John N. Constantino, Mark D. Shen,  
Meghan R. Swanson, Jed T. Elison, Sridhar Kandala, Annette M. Estes,  
Kelly N. Botteron, Louis Collins, Stephen R. Dager, Alan C. Evans, Guido Gerig,  
Hongbin Gu, Robert C. McKinstry, Sarah Paterson, Robert T. Schultz, Martin Styner,  
IBIS Network, Bradley L. Schlaggar, John R. Pruett Jr., Joseph Piven

\*Corresponding author. Email: remerson@med.unc.edu

Published 7 June 2017, *Sci. Transl. Med.* **9**, eaag2882 (2017)  
DOI: 10.1126/scitranslmed.aag2882

**This PDF file includes:**

Materials and Methods

Fig. S1. Individual classification accuracies.

Fig. S2. Null distribution of classification accuracy.

Table S1. The Talairach coordinates for each of the ROIs.

Table S2. Comparison to independent high-risk sample.

Reference (57)

## **Supplementary Materials:**

### **Materials and Methods**

#### *Whole-brain visualization*

To visualize functional connections that likely contribute to the accuracy of this classification approach, each pair of ROIs that were used in each of the nested feature sets (100% consensus) are projected onto a Talairach brain in Figure 2 in the Main Text. The Talairach coordinates and average connectivity values by group for these regions are listed in Table S1.

#### *Individual classification accuracy*

Since the primary goal is diagnostic classification for individuals, we also measured the individual classification accuracy, following Greene *et al.* (57), to understand how reliably each infant was classified across the nested models. This analysis determines the rate at which each of the 59 individuals is classified accurately by testing an SVM classifier created from each of the nested sets used in the primary analysis. This analysis is akin to a leave-two-out-cross-validation method in which one participant (test case) is removed while the remaining participants underwent the LOOCV procedure. Each nested set is trained on a slightly different training set, allowing the test case to be classified with 57 separate models. The test case is then tested on each of those models, and an average individual accuracy was calculated for that case. Once repeated using each participant as a test case, individual accuracy can be measured for each individual, reflecting how reliably that participant is classified across models. These results are shown in figure S1.

### *Comparison to independent high-risk sample*

In order to ensure that our sample of high-risk infants was representative of the general population of high-risk individuals, we compared the 24-month behavioral scores from our sample of infants to scores from an independent sample of high-risk infants. The comparison group is made up of 68 participants that were collected as part of the Infant Brain Imaging Study, but were not included in the main analysis because they did not complete a 6-month MRI visit. This group consisted of 20 ASD-pos and 48 ASD-neg 24-month-old participants. Unpaired t-tests were used to assess between-groups differences on scores from the RBS-R, MSEL, and CSBS. These results are presented in Table S2. Overall, these results suggest that there are no apparent differences between the high-risk sample used in our main analysis and this additional independent sample of high-risk infants. This supports the conclusion that our classifier results are likely to generalize to other high-risk infants.

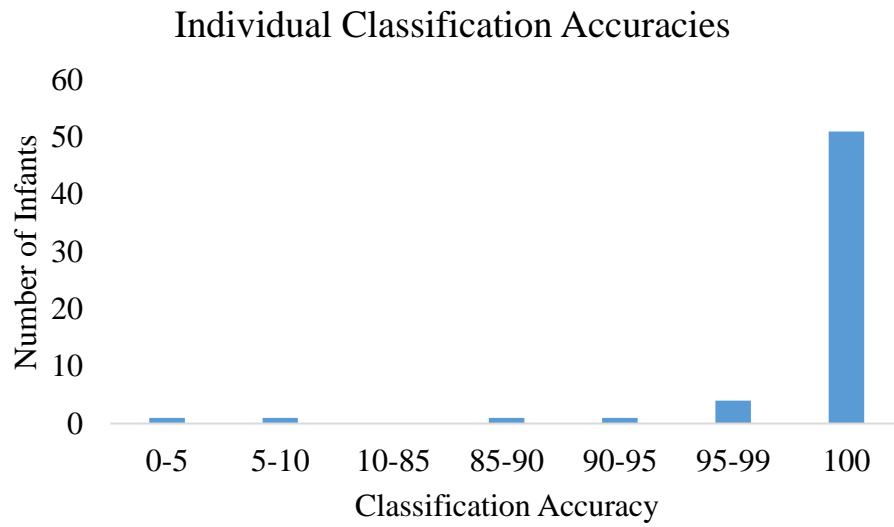

**Fig. S1. Individual classification accuracies.**

Each participant's individual classification accuracy was calculated with a model built from each of the nested classifiers.

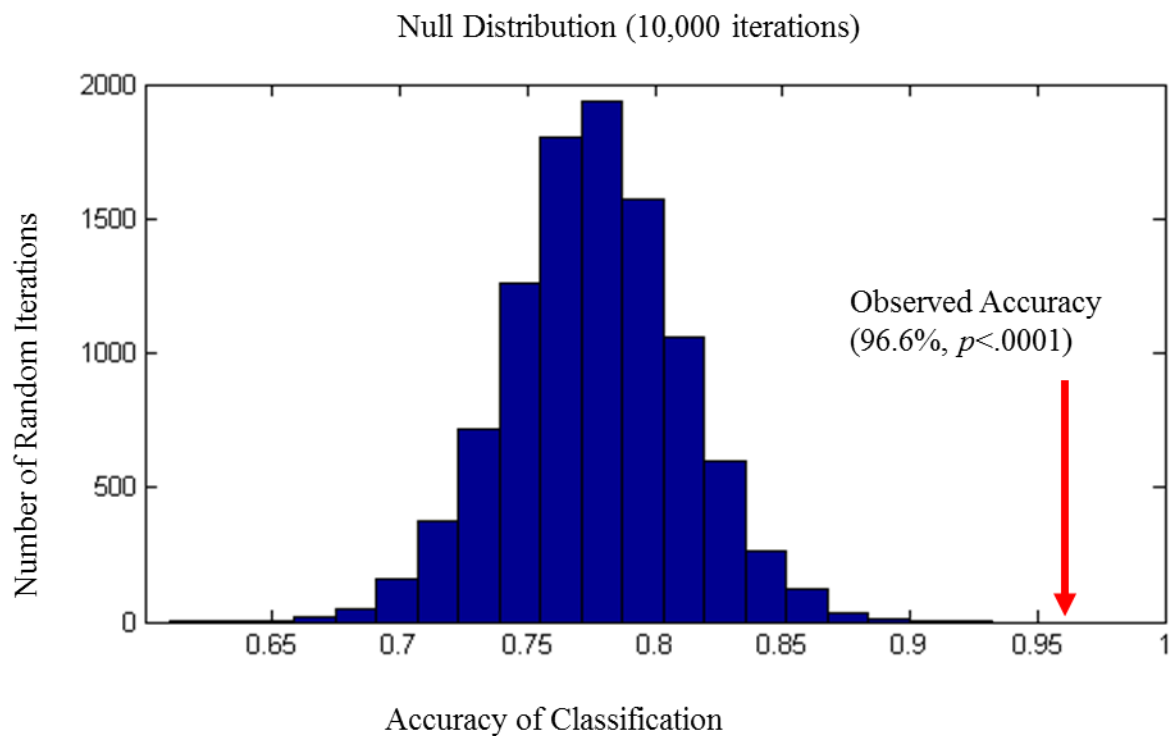

**Fig. S2. Null distribution of classification accuracy.**

The blue bars represent the number of random iterations at each level of accuracy. The red arrow marks the observed accuracy from the nested leave-one-out cross-validation classification analysis, corresponding to a  $p$ -value of  $p < .0001$ .

**Table S1. The Talairach coordinates for each of the ROIs.**

The regions are shown in Figure 2 (*Main Text*) are listed, along with the average Fisher z-transformed functional connectivity *r*-value for each group.

|              | ROI 1 |     |     | ROI 2 |     |        | Average r-value |         | <i>t</i> -value | <i>p</i> -value |
|--------------|-------|-----|-----|-------|-----|--------|-----------------|---------|-----------------|-----------------|
|              | X     | Y   | Z   | X     | Y   | Z      | ASD-pos         | ASD-neg |                 |                 |
| <b>CSBS</b>  | 46    | -45 | 44  | -52   | -25 | 41     | 0.391           | 0.132   | -3.0963         | 0.003           |
|              | -50   | 0   | -24 | 8     | -48 | 69     | 0.113           | -0.062  | -2.9325         | 0.0048          |
|              | -21   | 4   | -2  | 8     | -48 | 69     | -0.261          | -0.019  | 4.3423          | 0.0001          |
|              | -48   | -66 | -8  | 51    | -31 | 34     | 0.357           | 0.137   | -3.2171         | 0.0021          |
|              | -43   | -65 | 31  | -47   | -28 | 5      | -0.135          | 0.054   | 2.9743          | 0.0043          |
|              | -9    | 10  | 10  | -47   | -28 | 5      | 0.109           | -0.069  | -3.6864         | 0.0005          |
|              | -33   | 49  | 9   | -51   | -24 | 22     | 0.132           | -0.059  | -3.1777         | 0.0024          |
|              | -11   | -93 | -15 | -3    | -50 | 12     | -0.231          | -0.034  | 3.0045          | 0.0039          |
|              | 56    | -8  | -2  | 11    | 30  | 24     | 0.116           | -0.081  | -3.2679         | 0.0018          |
|              | 26    | -39 | -11 | 50    | -6  | -12    | 0.236           | 0.008   | -3.6447         | 0.0006          |
|              | -25   | -89 | 0   | 44    | -52 | 28     | 0.153           | -0.043  | -2.9257         | 0.0049          |
|              | 20    | -70 | -9  | -47   | -43 | 0      | 0.102           | -0.138  | -3.9104         | 0.0002          |
|              | -47   | -9  | -36 | 17    | -48 | -9     | 0.091           | -0.111  | -3.6725         | 0.0005          |
|              | 39    | -5  | 48  | 19    | -66 | 1      | -0.192          | 0.003   | 3.1196          | 0.0028          |
|              | 39    | -5  | 48  | -17   | -68 | 3      | -0.205          | -0.043  | 3.023           | 0.0037          |
|              | 39    | -39 | -20 | 26    | 4   | -4     | -0.249          | -0.069  | 3.0731          | 0.0032          |
| <b>MSEL</b>  | -41   | -56 | 41  | 26    | -96 | -15    | -0.120          | 0.059   | 2.9743          | 0.0043          |
|              | 4     | 18  | 39  | 26    | -96 | -15    | 0.039           | -0.108  | -3.0157         | 0.0038          |
|              | 29    | 49  | 20  | 53    | -33 | -14    | 0.248           | 0.027   | -3.0839         | 0.0031          |
|              | -26   | -71 | 33  | -8    | -54 | 57     | 0.347           | 0.152   | -3.0113         | 0.0039          |
|              | 17    | -79 | -34 | -52   | -25 | 41     | -0.125          | 0.078   | 2.9314          | 0.0048          |
|              | 52    | -47 | 36  | -52   | -25 | 41     | 0.162           | -0.065  | -3.7255         | 0.0004          |
|              | -10   | -21 | 8   | -44   | -34 | 44     | -0.207          | -0.046  | 2.9882          | 0.0041          |
|              | 11    | -20 | 9   | -44   | -34 | 44     | -0.247          | -0.055  | 3.8033          | 0.0004          |
|              | -40   | 40  | 2   | 51    | -31 | 34     | 0.293           | 0.039   | -3.4717         | 0.001           |
|              | -48   | -66 | -8  | 51    | -31 | 34     | 0.357           | 0.137   | -3.2171         | 0.0021          |
|              | 14    | -64 | 24  | 62    | -36 | 21     | 0.157           | -0.033  | -2.9463         | 0.0047          |
|              | -44   | -61 | 18  | -47   | -28 | 5      | -0.059          | 0.189   | 4.1552          | 0.0001          |
|              | -43   | -65 | 31  | -47   | -28 | 5      | -0.135          | 0.054   | 2.9743          | 0.0043          |
|              | -48   | -66 | -8  | 56    | -21 | 30     | 0.237           | 0.039   | -3.1136         | 0.0029          |
|              | -8    | -80 | 5   | -29   | -29 | 12     | 0.135           | -0.029  | -3.2171         | 0.0021          |
|              | -14   | -72 | -9  | -29   | -29 | 12     | 0.155           | -0.026  | -3.5678         | 0.0007          |
|              | -30   | -14 | 1   | -29   | -29 | 12     | 0.402           | 0.106   | -4.5618         | <.0001          |
|              | -10   | -21 | 8   | -39   | -75 | 22     | -0.001          | -0.192  | -3.1934         | 0.0023          |
|              | -4    | 21  | 46  | -43   | -65 | 31     | 0.084           | -0.090  | -2.9371         | 0.0048          |
|              | -11   | -93 | -15 | -3    | -50 | 12     | -0.231          | -0.034  | 3.0045          | 0.0039          |
|              | 19    | -85 | -4  | 14    | -64 | 24     | -0.159          | 0.049   | 3.1065          | 0.0029          |
|              | 19    | -85 | -4  | 28    | -76 | -31    | 0.223           | 0.005   | -3.4512         | 0.0011          |
|              | 22    | -58 | -22 | -44   | 27  | -9     | -0.221          | -0.032  | 3.1342          | 0.0027          |
|              | 39    | -5  | 48  | 23    | 39  | -9     | 0.168           | -0.039  | -3.4365         | 0.0011          |
|              | 39    | -5  | 48  | 32    | 48  | -6     | 0.154           | -0.014  | -3.3451         | 0.0015          |
|              | 23    | -60 | 57  | 39    | -5  | 48     | 0.243           | -0.047  | -4.043          | 0.0002          |
| 26           | -9    | 54  | -10 | -21   | 8   | -0.246 | -0.028          | 3.2268  | 0.0021          |                 |
| -53          | -41   | 12  | 27  | -3    | 7   | 0.095  | -0.099          | -2.9981 | 0.004           |                 |
| 20           | -70   | -9  | -47 | -9    | -36 | 0.045  | -0.145          | -3.1499 | 0.0026          |                 |
| <b>RBS-R</b> | 32    | 33  | -6  | -23   | -96 | -15    | -0.106          | 0.105   | 2.9824          | 0.0042          |
|              | 5     | 3   | 51  | 26    | -96 | -15    | 0.062           | -0.098  | -2.9271         | 0.0049          |
|              | -41   | -56 | 41  | 26    | -96 | -15    | -0.120          | 0.059   | 2.9743          | 0.0043          |
|              | -4    | 21  | 46  | 26    | -96 | -15    | 0.084           | -0.085  | -2.9766         | 0.0043          |
|              | 4     | 18  | 39  | 26    | -96 | -15    | 0.039           | -0.108  | -3.0157         | 0.0038          |
|              | 29    | 49  | 20  | 53    | -33 | -14    | 0.248           | 0.027   | -3.0839         | 0.0031          |
|              | -25   | -89 | 0   | 32    | 33  | -6     | -0.135          | 0.122   | 3.6749          | 0.0005          |
|              | 19    | -85 | -4  | -8    | -54 | 57     | -0.256          | -0.028  | 3.885           | 0.0003          |
|              | -26   | -71 | 33  | -8    | -54 | 57     | 0.347           | 0.152   | -3.0113         | 0.0039          |
|              | -40   | 40  | 2   | -52   | -25 | 41     | 0.261           | 0.026   | -3.1149         | 0.0029          |
|              | -21   | 4   | -2  | 8     | -48 | 69     | -0.261          | -0.019  | 4.3423          | 0.0001          |
|              | -30   | -14 | 1   | 8     | -48 | 69     | -0.324          | -0.112  | 3.7371          | 0.0004          |
|              | 52    | -47 | 36  | -39   | -22 | 52     | -0.005          | -0.193  | -3.1362         | 0.0027          |
|              | -27   | -79 | 16  | 26    | -42 | 57     | 0.114           | -0.107  | -3.0675         | 0.0033          |
|              | -41   | 20  | 31  | 47    | -24 | 42     | 0.143           | -0.047  | -2.9331         | 0.0048          |

|     |     |     |     |     |     |        |        |         |        |
|-----|-----|-----|-----|-----|-----|--------|--------|---------|--------|
| -10 | -21 | 8   | -44 | -34 | 44  | -0.207 | -0.046 | 2.9882  | 0.0041 |
| 11  | -20 | 9   | -44 | -34 | 44  | -0.247 | -0.055 | 3.8033  | 0.0004 |
| -48 | -66 | -8  | 51  | -31 | 34  | 0.357  | 0.137  | -3.2171 | 0.0021 |
| -40 | -60 | -10 | 47  | 4   | 3   | 0.074  | -0.111 | -3.3945 | 0.0013 |
| 5   | 60  | 3   | -33 | 0   | 6   | -0.292 | -0.098 | 3.4086  | 0.0012 |
| 27  | -3  | 7   | 62  | -36 | 21  | 0.088  | -0.098 | -3.1735 | 0.0024 |
| -9  | 10  | 10  | -58 | -27 | 13  | 0.097  | -0.092 | -3.0845 | 0.0031 |
| -14 | -72 | -9  | -47 | -28 | 5   | 0.144  | -0.017 | -3.1967 | 0.0023 |
| -9  | 10  | 10  | -47 | -28 | 5   | 0.109  | -0.069 | -3.6864 | 0.0005 |
| -33 | 49  | 9   | -51 | -24 | 22  | 0.132  | -0.059 | -3.1777 | 0.0024 |
| -40 | 40  | 2   | -51 | -24 | 22  | 0.269  | 0.013  | -3.5744 | 0.0007 |
| -3  | 36  | 20  | -53 | -12 | 12  | 0.138  | -0.061 | -3.2215 | 0.0021 |
| -23 | -90 | 15  | -53 | -12 | 12  | 0.079  | -0.124 | -3.3904 | 0.0013 |
| -33 | 49  | 9   | 56  | -21 | 30  | 0.161  | -0.038 | -3.2002 | 0.0022 |
| -8  | -80 | 5   | -29 | -29 | 12  | 0.135  | -0.029 | -3.2171 | 0.0021 |
| 22  | 6   | 5   | -29 | -29 | 12  | 0.227  | 0.049  | -2.9249 | 0.0049 |
| -30 | -14 | 1   | -29 | -29 | 12  | 0.402  | 0.106  | -4.5618 | <.0001 |
| -23 | -90 | 15  | -39 | -75 | 22  | -0.141 | 0.117  | 3.1456  | 0.0026 |
| -30 | -14 | 1   | 5   | 60  | 3   | -0.229 | -0.040 | 3.3357  | 0.0015 |
| -53 | -41 | 12  | 8   | 42  | -9  | 0.212  | 0.027  | -2.9973 | 0.004  |
| -41 | 9   | -30 | -17 | 57  | -3  | 0.132  | -0.107 | -3.5593 | 0.0008 |
| 51  | -45 | 22  | -44 | -61 | 18  | 0.142  | 0.399  | 3.5378  | 0.0008 |
| 49  | -31 | -2  | -44 | -61 | 18  | 0.130  | 0.344  | 3.2382  | 0.002  |
| -26 | -71 | 33  | -44 | -61 | 18  | 0.249  | 0.036  | -3.0366 | 0.0036 |
| -17 | -68 | 3   | -41 | 9   | -30 | 0.145  | -0.072 | -3.5503 | 0.0008 |
| 36  | 37  | 20  | 44  | 12  | -24 | -0.003 | -0.197 | -3.0982 | 0.003  |
| 50  | 3   | -24 | -55 | -27 | -14 | 0.224  | 0.439  | 2.9337  | 0.0048 |
| 56  | -54 | -12 | 26  | 12  | -12 | 0.064  | -0.098 | -2.9917 | 0.0041 |
| 50  | 27  | 6   | 5   | -60 | 33  | 0.141  | -0.029 | -3.4505 | 0.0011 |
| 8   | -72 | 9   | -3  | -50 | 12  | -0.175 | 0.045  | 3.0276  | 0.0037 |
| 6   | -81 | 4   | -3  | -50 | 12  | -0.237 | -0.012 | 3.4234  | 0.0012 |
| 19  | -66 | 1   | -3  | 32  | 39  | -0.293 | -0.118 | 3.2029  | 0.0022 |
| 24  | 43  | 31  | 11  | 30  | 24  | -0.042 | 0.178  | 3.0643  | 0.0033 |
| 56  | -8  | -2  | 11  | 30  | 24  | 0.116  | -0.081 | -3.2679 | 0.0018 |
| 26  | -39 | -11 | 50  | -6  | -12 | 0.236  | 0.008  | -3.6447 | 0.0006 |
| 19  | -85 | -4  | 28  | -76 | -31 | 0.223  | 0.005  | -3.4512 | 0.0011 |
| 20  | -70 | -9  | -47 | -43 | 0   | 0.102  | -0.138 | -3.9104 | 0.0002 |
| 56  | -8  | -2  | -7  | -72 | 38  | -0.192 | -0.033 | 3.0628  | 0.0033 |
| -29 | -12 | -33 | 10  | -67 | 39  | -0.264 | -0.061 | 3.2248  | 0.0021 |
| 49  | -31 | -2  | 8   | -90 | -9  | 0.155  | -0.044 | -3.2011 | 0.0022 |
| 19  | -85 | -4  | 17  | -90 | -15 | 0.654  | 0.408  | -3.1895 | 0.0023 |
| -47 | -9  | -36 | 17  | -48 | -9  | 0.091  | -0.111 | -3.6725 | 0.0005 |
| 39  | -5  | 48  | 19  | -66 | 1   | -0.192 | 0.003  | 3.1196  | 0.0028 |
| 12  | -78 | 38  | -23 | -90 | 15  | -0.057 | 0.197  | 3.2124  | 0.0022 |
| 32  | 48  | -6  | -17 | -68 | 3   | -0.205 | -0.027 | 3.109   | 0.0029 |
| 39  | -5  | 48  | -17 | -68 | 3   | -0.205 | -0.043 | 3.023   | 0.0037 |
| 32  | 48  | -6  | -15 | -53 | -2  | -0.237 | -0.042 | 3.0124  | 0.0039 |
| -53 | -41 | 12  | -15 | -53 | -2  | 0.166  | -0.023 | -2.9303 | 0.0049 |
| -38 | -87 | -9  | 25  | -79 | -16 | 0.433  | 0.164  | -3.7706 | 0.0004 |
| 49  | -35 | 9   | 25  | -79 | -16 | 0.071  | -0.102 | -3.0357 | 0.0036 |
| 44  | -60 | 4   | -3  | -81 | 18  | 0.183  | -0.029 | -3.096  | 0.003  |
| 35  | -84 | 11  | -38 | -87 | -9  | 0.370  | 0.109  | -3.4985 | 0.0009 |
| 26  | -9  | 54  | -25 | -89 | 0   | 0.132  | -0.063 | -3.1446 | 0.0026 |
| 24  | 43  | 31  | -31 | -78 | -15 | -0.216 | -0.033 | 3.2775  | 0.0018 |
| 22  | -58 | -22 | -51 | -50 | 39  | -0.036 | -0.213 | -3.2502 | 0.0019 |
| 39  | -5  | 48  | 32  | 48  | -6  | 0.154  | -0.014 | -3.3451 | 0.0015 |
| 39  | -5  | 48  | -41 | 33  | 24  | 0.277  | -0.031 | -4.3877 | 0.0001 |
| -32 | -48 | 44  | 39  | -5  | 48  | 0.218  | -0.030 | -3.7165 | 0.0005 |
| -32 | -48 | 44  | 11  | -20 | 9   | -0.317 | -0.145 | 3.6126  | 0.0006 |
| 39  | -39 | -20 | -21 | 4   | -2  | -0.279 | -0.070 | 3.4365  | 0.0011 |
| -53 | -41 | 12  | -30 | -14 | 1   | 0.077  | -0.116 | -3.3052 | 0.0016 |
| 20  | -70 | -9  | -47 | -9  | -36 | 0.045  | -0.145 | -3.1499 | 0.0026 |
| 39  | -39 | -20 | 26  | 4   | -4  | -0.249 | -0.069 | 3.0731  | 0.0032 |

**Table S2. Comparison to independent high-risk sample.**

Averages are broken down in each cohort between high-risk infants who went on to have ASD (ASD-pos) and those who did not (ASD-neg) for both the primary cohort (left panel) and the additional cohort (middle panel). The right panel, the group averages of the two cohorts are compared using t-tests between the ASD-neg as well for the ASD-pos subsets of infants from each cohort. These averages were compared using a two-sample t-test, corrected for unequal sample size. None of the *p*-values are significant (all *p*>0.07).

|       |                     | Averages       |         |         |            |         |         | t-tests        |                |                |                |
|-------|---------------------|----------------|---------|---------|------------|---------|---------|----------------|----------------|----------------|----------------|
|       |                     | Primary Cohort | ASD-pos | ASD-Neg | New Cohort | ASD-pos | ASD-Neg | ASD-neg        |                | ASD-pos        |                |
|       |                     |                |         |         |            |         |         | <i>t-value</i> | <i>p-value</i> | <i>t-value</i> | <i>p-value</i> |
| CSBS  | Social Interaction  | 2.14           | 0.75    | 2.40    | 2.33       | 1.05    | 2.28    | 0.48           | 0.71           | 0.91           | 0.12           |
| CSBS  | Joint Attention     | 3.30           | 1.63    | 3.62    | 3.20       | 1.88    | 3.72    | 0.43           | 0.80           | 0.47           | 0.73           |
| MSEL  | Expressive Language | 20.98          | 19.30   | 21.34   | 21.41      | 17.30   | 23.13   | 0.80           | 0.26           | 0.75           | 0.33           |
| MSEL  | Fine Motor          | 24.10          | 24.09   | 24.11   | 23.97      | 21.90   | 24.83   | 0.60           | 0.53           | 0.89           | 0.14           |
| MSEL  | Gross Motor         | 25.89          | 24.90   | 26.12   | 25.15      | 23.26   | 25.93   | 0.66           | 0.45           | 0.95           | 0.07           |
| MSEL  | Receptive Language  | 23.35          | 20.80   | 23.89   | 23.25      | 16.50   | 26.06   | 0.43           | 0.79           | 0.90           | 0.13           |
| MSEL  | Visual Reception    | 26.74          | 24.55   | 27.26   | 27.74      | 23.35   | 29.56   | 0.38           | 0.88           | 0.69           | 0.40           |
| RBS-R | Stereotyped         | 0.91           | 3.44    | 0.32    | 1.22       | 2.93    | 0.54    | 0.80           | 0.26           | 0.48           | 0.71           |
| RBS-R | Self-Injurious      | 0.64           | 1.89    | 0.34    | 0.84       | 1.71    | 0.49    | 0.60           | 0.53           | 0.39           | 0.87           |
| RBS-R | Compulsive          | 0.96           | 3.44    | 0.37    | 0.80       | 1.29    | 0.60    | 0.66           | 0.45           | 0.82           | 0.23           |
| RBS-R | Ritualistic         | 0.79           | 2.22    | 0.45    | 0.67       | 1.07    | 0.51    | 0.43           | 0.79           | 0.65           | 0.45           |
| RBS-R | Sameness            | 1.60           | 4.89    | 0.82    | 1.43       | 3.07    | 0.77    | 0.38           | 0.88           | 0.65           | 0.45           |
| RBS-R | Restricted          | 0.47           | 1.89    | 0.13    | 0.86       | 1.93    | 0.43    | 0.81           | 0.24           | 0.34           | 0.97           |
